# Supplementary material
Source: PubMed Central journal article supplement (PMC3708173)
Supplement: supp_M112.023143_mcp.M112.023143-2.pdf [file supp_M112.023143_mcp.M112.023143-2.pdf]

Instrument specific search parameters (ABSciex Triple-TOF 5600)

MS tolerance = 0.05 Da  
MSMS tolerance = 0.1 Da  
MS Std Dev=0.0011 Da  
MSMS Std Dev=0.01 Da  
Default charge states= 2-4

Fixed identification sets and probabilities

Terminal Amidated>  
    term\_spec  PepCTerm  prob  0.001

Amino>  
    Tyrosine  prob  0.0005

Ammonia-loss>  
    Asparagine  prob  0.001

Arg-loss>  
    Arginine  term\_spec  PepCTerm  prob  0.001

Arg-add>  
    term\_spec  PepNTerm  prob  0.001

Arg->Orn>  
    Arginine  prob  0.0004

Dethiomethyl>  
    Methionine  prob  0.01

Arg->GluSA>  
    Arginine  prob  0.0007

Carbamyl>  
    Lysine                  prob  0.0015  
    Arginine  prob  0.001  
    Cysteine  prob  0.00001  
    Methionine  prob  0.00001

Terminal Carbamyl>  
    term\_spec  PepNTerm  prob  0.006

Cation:Na>  
    Aspartic Acid  prob  0.0001  
    Glutamic Acid  prob  0.0015

Terminal Cation:Na>  
    term\_spec  PepCTerm  prob  0.00001

Cation:K>  
    Aspartic Acid  prob  0.0016  
    Glutamic Acid  prob  0.0022

Terminal Cation:K>  
    term\_spec  PepCTerm  prob  0.00001

Cation:Cu[I]>  
    Aspartic Acid  prob  0.00001  
    Glutamic Acid  prob  0.00001

Terminal Cation:Cu[I]>

```

                term_spec  PepCTerm   prob  0.00001
Cys->Dha>
  Cysteine      prob  0.001
Deamidated>
  Asparagine   prob  0.16
  Glutamine    prob  0.11
  Asn Or Asp   prob  0.16
  Gln Or Glu   prob  0.11
Dehydrated>
  Aspartic Acid  prob  0.0023
  Glutamic Acid  prob  0.002
  Serine         prob  0.0026
  Threonine      prob  0.003
Dehydro>
  Cysteine      prob  0.01
Didehydro>
  Threonine     prob  0.0001
Terminal Didehydro>
  Lysine        term_spec  PepCTerm   prob  0.0001
Delta:H(2)C(2)>
  Lysine        prob  0.004
  Histidine     prob  0.012
Terminal Delta:H(2)C(2)>
                term_spec  PepNTerm   prob  0.001
Delta:H(4)C(2)>
  Lysine        prob  0.001
  Histidine     prob  0.001
Terminal Delta:H(4)C(2)>
                term_spec  PepNTerm   prob  0.001
Formyl>
  Lysine        prob  0.002
Terminal Formyl>
                term_spec  PepNTerm   prob  0.002
Gln->pyro-Glu>
  Glutamine     term_spec  PepNTerm   prob  0.27
Glu->pyro-Glu>
  Glutamic Acid  term_spec  PepNTerm   prob  0.11
Lys-loss>
  Lysine        term_spec  PepCTerm   prob  0.001
Lys-add>
                term_spec  PepNTerm   prob  0.001
Met->Hse>
  Methionine    prob  0.00001
Met->Hsl>

```

Methionine prob 0.00001

Oxidation>

Methionine prob 0.15  
Cysteine prob 0.00001  
Histidine prob 0.005  
Tryptophan prob 0.013  
Proline prob 0.01

Dioxidation>

Methionine prob 0.01  
Cysteine prob 0.005  
Tryptophan prob 0.013  
Phenylalanine prob 0.00001

Trioxidation>

Cysteine prob 0.0001  
Tryptophan prob 0.0005

Pro->pyro-Glu>

Proline prob 0.0006

Pro->Pyrrolidinone>

Proline term\_spec PepCTerm prob 0.0001

Trp->Hydroxykynurenin>

Tryptophan prob 0.002

Trp->Kynurenin>

Tryptophan prob 0.02

Biological identification sets and probabilities

Acetyl>

Lysine prob 0.00003  
Serine prob 0.00015  
Threonine prob 0.00015  
Cysteine prob 0.001

Terminal Acetyl>

term\_spec PepNTerm prob 0.004

Protein Terminal Acetyl>

term\_spec ProtNTerm prob 0.1

Protein Terminal Amidated>

term\_spec ProtCTerm prob 0.0001

Amidino>

Cysteine prob 0.0001

Protein Terminal Ammonia-loss>

Serine term\_spec ProtNTerm prob 0.001  
Threonine term\_spec ProtNTerm prob 0.001

Archaeol>

Cysteine prob 0.0001

Biotin>

Lysine prob 0.00004

Protein Terminal Biotin>

```

                term_spec  ProtNTerm  prob  0.00001

Bromo>
  Tryptophan  prob  0.0005
  Phenylalanine  prob  0.00001
  Histidine  prob  0.00003
  Tyrosine  prob  0.00001

Dibromo>
  Tyrosine  prob  0.00005

Butyryl>
  Lysine  prob  0.00001

Carboxy>
  Aspartic Acid  prob  0.00015
  Glutamic Acid  prob  0.0003
  Methionine  prob  0.0001
  Lysine  prob  0.0001

Carboxy->Thiocarboxy>
  Glycine  term_spec  ProtCTerm  prob  0.0001

Carboxyethyl>
  Lysine  prob  0.0001

CHDH>
  Aspartic Acid  prob  0.0001

Chloro>
  Tyrosine  prob  0.00008

Dichloro>
  Tyrosine  prob  0.0001

Cholesterol>
                term_spec  ProtCTerm  prob  0.0001

CuSMo>
  Cysteine  prob  0.0001

Cyano>
  Cysteine  prob  0.0001

Cysteinylyl>
  Cysteine  prob  0.00001

Cys->Hcy>
  Cysteine  prob  0.0001

Cys->Oxoalanine>
  Cysteine  prob  0.00001

Cys->PyruvicAcid>
  Cysteine  term_spec  ProtNTerm  prob  0.0001

Deamidated>
  Arginine  prob  0.007

Protein Terminal Deamidated>
  Phenylalanine  term_spec  ProtNTerm  prob  0.0001

```

Decanoyl>  
 Serine prob 0.0001  
 Threonine prob 0.0001

Dehydrated>  
 Tyrosine prob 0.001

Protein Terminal Dehydrated>  
 Asparagine prob 0.001 term\_spec ProtCTerm  
 Glutamine prob 0.001 term\_spec ProtCTerm

Delta:S(-1)Se(1)>  
 Cysteine prob 0.0001  
 Methionine prob 0.0001

Delta:Se(1)>  
 Cysteine prob 0.0001

Deoxy>  
 Aspartic Acid prob 0.0001

Diacylglycerol>  
 Cysteine prob 0.0001

Didehydro>  
 Serine prob 0.0001  
 Tyrosine prob 0.0001

Didehydroretinylidene>  
 Lysine prob 0.0001

Diironsubcluster>  
 Cysteine prob 0.0001

Diphthamide>  
 Histidine prob 0.00016

Dipyrrolylmethanemethyl>  
 Cysteine prob 0.0001

FAD>  
 Cysteine prob 0.00001  
 Histidine prob 0.00001  
 Tyrosine prob 0.00001

FMN>  
 Serine prob 0.0001  
 Threonine prob 0.0001

FMNC>  
 Cysteine prob 0.00001

FMNH>  
 Cysteine prob 0.0001  
 Histidine prob 0.0001

Farnesyl>  
 Cysteine prob 0.0004

Hydroxyfarnesyl>  
 Cysteine prob 0.00001

FormaldehydeAdduct>  
Tryptophan prob 0.003

Protein Terminal Formyl>  
term\_spec ProtNTerm prob 0.00001

FormylMet>  
term\_spec ProtNTerm prob 0.00001

Geranylgeranyl>  
Cysteine prob 0.00001

Protein Terminal Hex>  
term\_spec ProtNTerm prob 0.00001

dHex>  
Serine prob 0.00004  
Threonine prob 0.00001  
Asparagine prob 0.00007

HexNAc>  
Serine prob 0.0008  
Threonine prob 0.0003  
Asparagine prob 0.0007

Hex(1)HexNAc(1)>  
Serine prob 0.00001  
Threonine prob 0.00001  
Asparagine prob 0.00001

Hex(1)HexNAc(1)NeuAc(1)>  
Serine prob 0.00001  
Threonine prob 0.00005  
Asparagine prob 0.00003

Hex(1)HexNAc(1)NeuAc(2)>  
Serine prob 0.00001  
Threonine prob 0.00003  
Asparagine prob 0.00002

Hydroxycinnamyl>  
Cysteine prob 0.0001

Hydroxyheme>  
Glutamic Acid prob 0.0001

Hydroxymethyl>  
Asparagine prob 0.0001

Hydroxytrimethyl>  
Lysine prob 0.0001

Hypusine>  
Lysine prob 0.0001

Iodo>  
Tyrosine prob 0.0007  
Histidine prob 0.0001

Diiodo>  
Tyrosine prob 0.00002

```

    Histidine   prob  0.00001

Lipoyl>
    Lysine      prob  0.00001

Lys->Allysine>
    Lysine      prob  0.0003

Lys->Hydroxyallysine>
    Lysine      prob  0.00013

Lys->AminoadipicAcid>
    Lysine      prob  0.0001

Protein Terminal Lys-loss>
    Lysine      term_spec  ProtCTerm  prob  0.001

Met->Hcy>
    Methionine  prob  0.001

Methyl>
    Arginine    prob  0.0003
    Histidine   prob  0.002
    Lysine      prob  0.0004
    Asparagine  prob  0.0005
    Glutamine   prob  0.0005
    Cysteine    prob  0.001
    Isoleucine  prob  0.0002
    Leucine     prob  0.0002
    Serine      prob  0.0002
    Threonine   prob  0.0004
    Aspartic Acid  prob  0.001
    Glutamic Acid  prob  0.001

Protein N-Terminal Methyl>
    term_spec  ProtNTerm  prob  0.0001

Protein C-Terminal Methyl>
    term_spec  ProtCTerm  prob  0.0001

Dimethyl>
    Arginine    prob  0.0009
    Lysine      prob  0.0006
    Asparagine  prob  0.0001

Protein Terminal Dimethyl>
    Proline     term_spec  ProtNTerm  prob  0.0001

Trimethyl>
    Arginine    prob  0.00005
    Lysine      prob  0.0006
    Alanine     prob  0.00001

Methyl+Deamidated>
    Glutamine   prob  0.0001

Methylpyrroline>
    Lysine      prob  0.0001

Methylthio>
    Asparagine  prob  0.00001
    Aspartic Acid  prob  0.00002

```

Microcin>  
term\_spec ProtCTerm prob 0.0001

MicrocinC7>  
term\_spec ProtCTerm prob 0.0001

Molybdopterin>  
Cysteine prob 0.0001

MolybdopterinGD>  
Cysteine prob 0.0001  
Aspartic Acid prob 0.00002

MolybdopterinGD+Delta:S(-1)Se(1)>  
Cysteine prob 0.0001

Myristoyl>  
Lysine prob 0.0001  
Cysteine prob 0.0001

Protein Terminal Myristoyl>  
Glycine term\_spec ProtNTerm prob 0.0001

NeuAc>  
Serine prob 0.00001  
Threonine prob 0.00001  
Asparagine prob 0.00001

NeuGc>  
Serine prob 0.00001  
Threonine prob 0.00001  
Asparagine prob 0.00002

Nicotinyl>  
Lysine prob 0.00007

Nitro>  
Tyrosine prob 0.0001  
Tryptophan prob 0.0003

Octanoyl>  
Serine prob 0.0001  
Threonine prob 0.0001

Oxidation>  
Aspartic Acid prob 0.0009  
Asparagine prob 0.0012  
Cysteine prob 0.001  
Phenylalanine prob 0.001  
Tyrosine prob 0.0013  
Lysine prob 0.00005  
Arginine prob 0.0014  
Proline prob 0.01

Terminal Oxidation>  
Glycine term\_spec PepCTerm prob 0.0001

Dioxidation>  
Proline prob 0.0002  
Arginine prob 0.0002  
Lysine prob 0.00002



|                             |           |           |      |         |
|-----------------------------|-----------|-----------|------|---------|
| Tyrosine                    | prob      | 0.0002    |      |         |
| Trioxidation>               |           |           |      |         |
| Tyrosine                    | prob      | 0.0002    |      |         |
| Palmitoleyl>                |           |           |      |         |
| Cysteine                    | prob      | 0.00001   |      |         |
| Palmitoyl>                  |           |           |      |         |
| Cysteine                    | prob      | 0.00001   |      |         |
| Lysine                      | prob      | 0.00001   |      |         |
| Serine                      | prob      | 0.00001   |      |         |
| Threonine                   | prob      | 0.00001   |      |         |
| Tripalmitate>               |           |           |      |         |
| Cysteine                    | term_spec | ProtNTerm | prob | 0.00001 |
| Phosphopantetheine>         |           |           |      |         |
| Serine                      | prob      | 0.00002   |      |         |
| Phosphoadenosine>           |           |           |      |         |
| Lysine                      | prob      | 0.0001    |      |         |
| Tyrosine                    | prob      | 0.0001    |      |         |
| Threonine                   | prob      | 0.0001    |      |         |
| Histidine                   | prob      | 0.0001    |      |         |
| Phosphoguanosine>           |           |           |      |         |
| Lysine                      | prob      | 0.0001    |      |         |
| Histidine                   | prob      | 0.0001    |      |         |
| PhosphoribosyldephosphoCoA> |           |           |      |         |
| Serine                      | prob      | 0.0001    |      |         |
| PhosphoUridine>             |           |           |      |         |
| Tyrosine                    | prob      | 0.0001    |      |         |
| Histidine                   | prob      | 0.0001    |      |         |
| Phospho(Ser,Thr)>           |           |           |      |         |
| Serine                      | prob      | 0.002     |      |         |
| Threonine                   | prob      | 0.0007    |      |         |
| Phospho>                    |           |           |      |         |
| Tyrosine                    | prob      | 0.00001   |      |         |
| Lysine                      | prob      | 0.0001    |      |         |
| Histidine                   | prob      | 0.0001    |      |         |
| Aspartic Acid               | prob      | 0.0001    |      |         |
| Arginine                    | prob      | 0.0001    |      |         |
| Cysteine                    | prob      | 0.00001   |      |         |
| Propionyl>                  |           |           |      |         |
| Lysine                      | prob      | 0.00001   |      |         |
| Phycocyanobilin>            |           |           |      |         |
| Cysteine                    | prob      | 0.0001    |      |         |
| Phycoerythrobilin>          |           |           |      |         |
| Cysteine                    | prob      | 0.0001    |      |         |
| Phytochromobilin>           |           |           |      |         |
| Cysteine                    | prob      | 0.0001    |      |         |
| PyridoxalPhosphate>         |           |           |      |         |

Lysine           prob 0.0001  
 PyruvicAcidIminyl>  
     Lysine           prob 0.0001  
 Protein Terminal PyruvicAcidIminyl>  
     Valine          term\_spec   ProtNTerm   prob 0.0001  
     Cysteine       term\_spec   ProtNTerm   prob 0.0001  
 Quinone>  
     Tryptophan   prob 0.0001  
     Tyrosine     prob 0.0001  
 Retinylidene>  
     Lysine           prob 0.0001  
 Ser->LacticAcid>  
     Serine          prob 0.0001  
 Ser->Oxoalanine>  
     Serine          prob 0.0003  
 Succinyl>  
                   term\_spec   ProtNTerm   prob 0.00008  
 Sulfide>  
     Cysteine       prob 0.00002  
 Sulfo>  
     Serine          prob 0.00002  
     Threonine      prob 0.00001  
     Tyrosine       prob 0.00006  
     Cysteine       prob 0.0001  
 Thyroxine>  
     Tyrosine       prob 0.0001  
 Triiodothyronine>  
     Tyrosine       prob 0.0001  
 Tyr->Dha>  
     Tyrosine       prob 0.0001  
 Ubiquitination LRGG>  
     Lysine          prob 0.00001

Alkylation identification probabilities for Iodoethanol

Ethanolyl>  
     Cysteine       prob 0.95  
     Lysine          prob 0.01  
     Selenocysteine   prob 0.005

Terminal Ethanolyl>  
                   term\_spec   PepNTerm   prob

Iodo>  
     Tyrosine       prob 0.05  
     Histidine      prob 0.01

Alkylation identification probabilities for Iodoacetamide

Cysteine       prob 0.994

|                |      |        |
|----------------|------|--------|
| Lysine         | prob | 0.006  |
| Aspartic Acid  | prob | 0.0016 |
| Glutamic Acid  | prob | 0.0018 |
| Histidine      | prob | 0.001  |
| Selenocysteine | prob | 0.005  |
| Serine         | prob | 0.001  |
| Threonine      | prob | 0.001  |
| Tyrosine       | prob | 0.001  |

Terminal Carbamidomethyl>  
term\_spec PepNTerm

Dicarbamidomethyl>  
Aspartic Acid prob 0.001

Carbamyl>  
Methionine prob 0.001

Iodo>  
Tyrosine prob 0.0012  
Histidine prob 0.00019

Amino acid substitution probabilities

|             |         |                      |
|-------------|---------|----------------------|
| residue="A" | sub="R" | probability="0.0015" |
| residue="R" | sub="A" | probability="0.0015" |
| residue="A" | sub="N" | probability="0.001"  |
| residue="N" | sub="A" | probability="0.001"  |
| residue="A" | sub="D" | probability="0.001"  |
| residue="D" | sub="A" | probability="0.001"  |
| residue="A" | sub="C" | probability="0.003"  |
| residue="C" | sub="A" | probability="0.003"  |
| residue="A" | sub="Q" | probability="0.0015" |
| residue="Q" | sub="A" | probability="0.0015" |
| residue="A" | sub="E" | probability="0.0015" |
| residue="E" | sub="A" | probability="0.0015" |
| residue="A" | sub="G" | probability="0.003"  |
| residue="G" | sub="A" | probability="0.003"  |
| residue="A" | sub="H" | probability="0.001"  |
| residue="H" | sub="A" | probability="0.001"  |
| residue="I" | sub="A" | probability="0.0015" |
| residue="A" | sub="L" | probability="0.0015" |
| residue="L" | sub="A" | probability="0.0015" |
| residue="A" | sub="K" | probability="0.0015" |
| residue="K" | sub="A" | probability="0.0015" |
| residue="A" | sub="M" | probability="0.0015" |
| residue="M" | sub="A" | probability="0.0015" |
| residue="A" | sub="F" | probability="0.001"  |
| residue="F" | sub="A" | probability="0.001"  |
| residue="A" | sub="P" | probability="0.0015" |
| residue="P" | sub="A" | probability="0.0015" |
| residue="A" | sub="S" | probability="0.004"  |
| residue="S" | sub="A" | probability="0.004"  |
| residue="A" | sub="T" | probability="0.003"  |
| residue="T" | sub="A" | probability="0.003"  |
| residue="A" | sub="W" | probability="0.0008" |
| residue="W" | sub="A" | probability="0.0008" |
| residue="A" | sub="Y" | probability="0.001"  |
| residue="Y" | sub="A" | probability="0.001"  |
| residue="A" | sub="V" | probability="0.003"  |
| residue="V" | sub="A" | probability="0.003"  |
| residue="R" | sub="N" | probability="0.003"  |
| residue="N" | sub="R" | probability="0.003"  |

|             |         |                      |
|-------------|---------|----------------------|
| residue="R" | sub="D" | probability="0.001"  |
| residue="D" | sub="R" | probability="0.001"  |
| residue="R" | sub="C" | probability="0.0008" |
| residue="C" | sub="R" | probability="0.0008" |
| residue="R" | sub="Q" | probability="0.004"  |
| residue="Q" | sub="R" | probability="0.004"  |
| residue="R" | sub="E" | probability="0.003"  |
| residue="E" | sub="R" | probability="0.003"  |
| residue="R" | sub="G" | probability="0.001"  |
| residue="G" | sub="R" | probability="0.001"  |
| residue="R" | sub="H" | probability="0.003"  |
| residue="H" | sub="R" | probability="0.003"  |
| residue="I" | sub="R" | probability="0.0008" |
| residue="R" | sub="L" | probability="0.001"  |
| residue="L" | sub="R" | probability="0.001"  |
| residue="R" | sub="K" | probability="0.005"  |
| residue="K" | sub="R" | probability="0.005"  |
| residue="R" | sub="M" | probability="0.0015" |
| residue="M" | sub="R" | probability="0.0015" |
| residue="R" | sub="F" | probability="0.0008" |
| residue="F" | sub="R" | probability="0.0008" |
| residue="R" | sub="P" | probability="0.001"  |
| residue="P" | sub="R" | probability="0.001"  |
| residue="R" | sub="S" | probability="0.0015" |
| residue="S" | sub="R" | probability="0.0015" |
| residue="R" | sub="T" | probability="0.0015" |
| residue="T" | sub="R" | probability="0.0015" |
| residue="R" | sub="W" | probability="0.0008" |
| residue="W" | sub="R" | probability="0.0008" |
| residue="R" | sub="Y" | probability="0.001"  |
| residue="Y" | sub="R" | probability="0.001"  |
| residue="R" | sub="V" | probability="0.0008" |
| residue="V" | sub="R" | probability="0.0008" |
| residue="D" | sub="N" | probability="0.004"  |
| residue="N" | sub="C" | probability="0.0008" |
| residue="C" | sub="N" | probability="0.0008" |
| residue="N" | sub="Q" | probability="0.003"  |
| residue="Q" | sub="N" | probability="0.003"  |
| residue="N" | sub="E" | probability="0.003"  |
| residue="E" | sub="N" | probability="0.003"  |
| residue="N" | sub="G" | probability="0.003"  |
| residue="G" | sub="N" | probability="0.003"  |
| residue="N" | sub="H" | probability="0.004"  |
| residue="H" | sub="N" | probability="0.004"  |
| residue="I" | sub="N" | probability="0.0008" |
| residue="N" | sub="L" | probability="0.0008" |
| residue="L" | sub="N" | probability="0.0008" |
| residue="N" | sub="K" | probability="0.003"  |
| residue="K" | sub="N" | probability="0.003"  |
| residue="N" | sub="M" | probability="0.001"  |
| residue="M" | sub="N" | probability="0.001"  |
| residue="N" | sub="F" | probability="0.0008" |
| residue="F" | sub="N" | probability="0.0008" |
| residue="N" | sub="P" | probability="0.001"  |
| residue="P" | sub="N" | probability="0.001"  |
| residue="N" | sub="S" | probability="0.004"  |
| residue="S" | sub="N" | probability="0.004"  |
| residue="N" | sub="T" | probability="0.003"  |
| residue="T" | sub="N" | probability="0.003"  |
| residue="N" | sub="W" | probability="0.0008" |
| residue="W" | sub="N" | probability="0.0008" |
| residue="N" | sub="Y" | probability="0.001"  |

|             |         |                      |
|-------------|---------|----------------------|
| residue="Y" | sub="N" | probability="0.001"  |
| residue="N" | sub="V" | probability="0.0008" |
| residue="V" | sub="N" | probability="0.0008" |
| residue="D" | sub="C" | probability="0.0008" |
| residue="C" | sub="D" | probability="0.0008" |
| residue="D" | sub="Q" | probability="0.003"  |
| residue="Q" | sub="D" | probability="0.003"  |
| residue="D" | sub="E" | probability="0.005"  |
| residue="E" | sub="D" | probability="0.005"  |
| residue="D" | sub="G" | probability="0.0015" |
| residue="G" | sub="D" | probability="0.0015" |
| residue="D" | sub="H" | probability="0.0015" |
| residue="H" | sub="D" | probability="0.0015" |
| residue="I" | sub="D" | probability="0.0008" |
| residue="D" | sub="L" | probability="0.0008" |
| residue="L" | sub="D" | probability="0.0008" |
| residue="D" | sub="K" | probability="0.0015" |
| residue="K" | sub="D" | probability="0.0015" |
| residue="D" | sub="M" | probability="0.0008" |
| residue="M" | sub="D" | probability="0.0008" |
| residue="D" | sub="F" | probability="0.0008" |
| residue="F" | sub="D" | probability="0.0008" |
| residue="D" | sub="P" | probability="0.0015" |
| residue="P" | sub="D" | probability="0.0015" |
| residue="D" | sub="S" | probability="0.003"  |
| residue="S" | sub="D" | probability="0.003"  |
| residue="D" | sub="T" | probability="0.0015" |
| residue="T" | sub="D" | probability="0.0015" |
| residue="D" | sub="W" | probability="0.0008" |
| residue="W" | sub="D" | probability="0.0008" |
| residue="D" | sub="Y" | probability="0.0008" |
| residue="Y" | sub="D" | probability="0.0008" |
| residue="D" | sub="V" | probability="0.0008" |
| residue="V" | sub="D" | probability="0.0008" |
| residue="C" | sub="Q" | probability="0.0008" |
| residue="Q" | sub="C" | probability="0.0008" |
| residue="C" | sub="E" | probability="0.0008" |
| residue="E" | sub="C" | probability="0.0008" |
| residue="C" | sub="G" | probability="0.0008" |
| residue="G" | sub="C" | probability="0.0008" |
| residue="C" | sub="H" | probability="0.0008" |
| residue="H" | sub="C" | probability="0.0008" |
| residue="I" | sub="C" | probability="0.0015" |
| residue="C" | sub="L" | probability="0.0015" |
| residue="L" | sub="C" | probability="0.0015" |
| residue="C" | sub="K" | probability="0.0008" |
| residue="K" | sub="C" | probability="0.0008" |
| residue="C" | sub="M" | probability="0.0015" |
| residue="M" | sub="C" | probability="0.0015" |
| residue="C" | sub="F" | probability="0.001"  |
| residue="F" | sub="C" | probability="0.001"  |
| residue="C" | sub="P" | probability="0.0008" |
| residue="P" | sub="C" | probability="0.0008" |
| residue="C" | sub="S" | probability="0.0015" |
| residue="S" | sub="C" | probability="0.0015" |
| residue="C" | sub="T" | probability="0.0015" |
| residue="T" | sub="C" | probability="0.0015" |
| residue="C" | sub="W" | probability="0.001"  |
| residue="W" | sub="C" | probability="0.001"  |
| residue="C" | sub="Y" | probability="0.001"  |
| residue="Y" | sub="C" | probability="0.001"  |
| residue="C" | sub="V" | probability="0.0015" |

|             |         |                      |
|-------------|---------|----------------------|
| residue="V" | sub="C" | probability="0.0015" |
| residue="E" | sub="Q" | probability="0.005"  |
| residue="Q" | sub="G" | probability="0.001"  |
| residue="G" | sub="Q" | probability="0.001"  |
| residue="Q" | sub="H" | probability="0.003"  |
| residue="H" | sub="Q" | probability="0.003"  |
| residue="I" | sub="Q" | probability="0.0008" |
| residue="Q" | sub="L" | probability="0.001"  |
| residue="L" | sub="Q" | probability="0.001"  |
| residue="Q" | sub="K" | probability="0.004"  |
| residue="K" | sub="Q" | probability="0.004"  |
| residue="Q" | sub="M" | probability="0.003"  |
| residue="M" | sub="Q" | probability="0.003"  |
| residue="Q" | sub="F" | probability="0.0008" |
| residue="F" | sub="Q" | probability="0.0008" |
| residue="Q" | sub="P" | probability="0.0015" |
| residue="P" | sub="Q" | probability="0.0015" |
| residue="Q" | sub="S" | probability="0.003"  |
| residue="S" | sub="Q" | probability="0.003"  |
| residue="Q" | sub="T" | probability="0.0015" |
| residue="T" | sub="Q" | probability="0.0015" |
| residue="Q" | sub="W" | probability="0.001"  |
| residue="W" | sub="Q" | probability="0.001"  |
| residue="Q" | sub="Y" | probability="0.0015" |
| residue="Y" | sub="Q" | probability="0.0015" |
| residue="Q" | sub="V" | probability="0.001"  |
| residue="V" | sub="Q" | probability="0.001"  |
| residue="E" | sub="G" | probability="0.001"  |
| residue="G" | sub="E" | probability="0.001"  |
| residue="E" | sub="H" | probability="0.003"  |
| residue="H" | sub="E" | probability="0.003"  |
| residue="I" | sub="E" | probability="0.0008" |
| residue="E" | sub="L" | probability="0.0008" |
| residue="L" | sub="E" | probability="0.0008" |
| residue="E" | sub="K" | probability="0.004"  |
| residue="K" | sub="E" | probability="0.004"  |
| residue="E" | sub="M" | probability="0.001"  |
| residue="M" | sub="E" | probability="0.001"  |
| residue="E" | sub="F" | probability="0.0008" |
| residue="F" | sub="E" | probability="0.0008" |
| residue="E" | sub="P" | probability="0.0015" |
| residue="P" | sub="E" | probability="0.0015" |
| residue="E" | sub="S" | probability="0.003"  |
| residue="S" | sub="E" | probability="0.003"  |
| residue="E" | sub="T" | probability="0.0015" |
| residue="T" | sub="E" | probability="0.0015" |
| residue="E" | sub="W" | probability="0.0008" |
| residue="W" | sub="E" | probability="0.0008" |
| residue="E" | sub="Y" | probability="0.001"  |
| residue="Y" | sub="E" | probability="0.001"  |
| residue="E" | sub="V" | probability="0.001"  |
| residue="V" | sub="E" | probability="0.001"  |
| residue="G" | sub="H" | probability="0.001"  |
| residue="H" | sub="G" | probability="0.001"  |
| residue="I" | sub="G" | probability="0.0008" |
| residue="G" | sub="L" | probability="0.0008" |
| residue="L" | sub="G" | probability="0.0008" |
| residue="G" | sub="K" | probability="0.001"  |
| residue="K" | sub="G" | probability="0.001"  |
| residue="G" | sub="M" | probability="0.0008" |
| residue="M" | sub="G" | probability="0.0008" |
| residue="G" | sub="F" | probability="0.0008" |

|             |         |                      |
|-------------|---------|----------------------|
| residue="F" | sub="G" | probability="0.0008" |
| residue="G" | sub="P" | probability="0.001"  |
| residue="P" | sub="G" | probability="0.001"  |
| residue="G" | sub="S" | probability="0.003"  |
| residue="S" | sub="G" | probability="0.003"  |
| residue="G" | sub="T" | probability="0.001"  |
| residue="T" | sub="G" | probability="0.001"  |
| residue="G" | sub="W" | probability="0.001"  |
| residue="W" | sub="G" | probability="0.001"  |
| residue="G" | sub="Y" | probability="0.0008" |
| residue="Y" | sub="G" | probability="0.0008" |
| residue="G" | sub="V" | probability="0.0008" |
| residue="V" | sub="G" | probability="0.0008" |
| residue="I" | sub="H" | probability="0.0008" |
| residue="H" | sub="L" | probability="0.0008" |
| residue="L" | sub="H" | probability="0.0008" |
| residue="H" | sub="K" | probability="0.0015" |
| residue="K" | sub="H" | probability="0.0015" |
| residue="H" | sub="M" | probability="0.001"  |
| residue="M" | sub="H" | probability="0.001"  |
| residue="H" | sub="F" | probability="0.0015" |
| residue="F" | sub="H" | probability="0.0015" |
| residue="H" | sub="P" | probability="0.001"  |
| residue="P" | sub="H" | probability="0.001"  |
| residue="H" | sub="S" | probability="0.0015" |
| residue="S" | sub="H" | probability="0.0015" |
| residue="H" | sub="T" | probability="0.001"  |
| residue="T" | sub="H" | probability="0.001"  |
| residue="H" | sub="W" | probability="0.001"  |
| residue="W" | sub="H" | probability="0.001"  |
| residue="H" | sub="Y" | probability="0.005"  |
| residue="Y" | sub="H" | probability="0.005"  |
| residue="H" | sub="V" | probability="0.0008" |
| residue="V" | sub="H" | probability="0.0008" |
| residue="I" | sub="K" | probability="0.0008" |
| residue="I" | sub="M" | probability="0.004"  |
| residue="I" | sub="F" | probability="0.003"  |
| residue="I" | sub="P" | probability="0.0008" |
| residue="I" | sub="S" | probability="0.001"  |
| residue="I" | sub="T" | probability="0.0015" |
| residue="I" | sub="W" | probability="0.0008" |
| residue="I" | sub="Y" | probability="0.0015" |
| residue="I" | sub="V" | probability="0.008"  |
| residue="L" | sub="K" | probability="0.001"  |
| residue="K" | sub="L" | probability="0.001"  |
| residue="L" | sub="M" | probability="0.005"  |
| residue="M" | sub="L" | probability="0.005"  |
| residue="L" | sub="F" | probability="0.003"  |
| residue="F" | sub="L" | probability="0.003"  |
| residue="L" | sub="P" | probability="0.0008" |
| residue="P" | sub="L" | probability="0.0008" |
| residue="L" | sub="S" | probability="0.001"  |
| residue="S" | sub="L" | probability="0.001"  |
| residue="L" | sub="T" | probability="0.0015" |
| residue="T" | sub="L" | probability="0.0015" |
| residue="L" | sub="W" | probability="0.001"  |
| residue="W" | sub="L" | probability="0.001"  |
| residue="L" | sub="Y" | probability="0.0015" |
| residue="Y" | sub="L" | probability="0.0015" |
| residue="L" | sub="V" | probability="0.004"  |
| residue="V" | sub="L" | probability="0.004"  |
| residue="K" | sub="M" | probability="0.0015" |

|             |         |                      |
|-------------|---------|----------------------|
| residue="M" | sub="K" | probability="0.0015" |
| residue="K" | sub="F" | probability="0.0008" |
| residue="F" | sub="K" | probability="0.0008" |
| residue="K" | sub="P" | probability="0.0015" |
| residue="P" | sub="K" | probability="0.0015" |
| residue="K" | sub="S" | probability="0.003"  |
| residue="S" | sub="K" | probability="0.003"  |
| residue="K" | sub="T" | probability="0.0015" |
| residue="T" | sub="K" | probability="0.0015" |
| residue="K" | sub="W" | probability="0.0008" |
| residue="W" | sub="K" | probability="0.0008" |
| residue="K" | sub="Y" | probability="0.001"  |
| residue="Y" | sub="K" | probability="0.001"  |
| residue="K" | sub="V" | probability="0.001"  |
| residue="V" | sub="K" | probability="0.001"  |
| residue="M" | sub="F" | probability="0.003"  |
| residue="F" | sub="M" | probability="0.003"  |
| residue="M" | sub="P" | probability="0.001"  |
| residue="P" | sub="M" | probability="0.001"  |
| residue="M" | sub="S" | probability="0.0015" |
| residue="S" | sub="M" | probability="0.0015" |
| residue="M" | sub="T" | probability="0.0015" |
| residue="T" | sub="M" | probability="0.0015" |
| residue="M" | sub="W" | probability="0.0015" |
| residue="W" | sub="M" | probability="0.0015" |
| residue="M" | sub="Y" | probability="0.0015" |
| residue="Y" | sub="M" | probability="0.0015" |
| residue="M" | sub="V" | probability="0.004"  |
| residue="V" | sub="M" | probability="0.004"  |
| residue="F" | sub="P" | probability="0.0008" |
| residue="P" | sub="F" | probability="0.0008" |
| residue="F" | sub="S" | probability="0.001"  |
| residue="S" | sub="F" | probability="0.001"  |
| residue="F" | sub="T" | probability="0.001"  |
| residue="T" | sub="F" | probability="0.001"  |
| residue="F" | sub="W" | probability="0.004"  |
| residue="W" | sub="F" | probability="0.004"  |
| residue="F" | sub="Y" | probability="0.008"  |
| residue="Y" | sub="F" | probability="0.008"  |
| residue="F" | sub="V" | probability="0.0015" |
| residue="V" | sub="F" | probability="0.0015" |
| residue="P" | sub="S" | probability="0.0015" |
| residue="S" | sub="P" | probability="0.0015" |
| residue="P" | sub="T" | probability="0.0015" |
| residue="T" | sub="P" | probability="0.0015" |
| residue="P" | sub="W" | probability="0.0008" |
| residue="W" | sub="P" | probability="0.0008" |
| residue="P" | sub="Y" | probability="0.0008" |
| residue="Y" | sub="P" | probability="0.0008" |
| residue="P" | sub="V" | probability="0.001"  |
| residue="V" | sub="P" | probability="0.001"  |
| residue="S" | sub="T" | probability="0.004"  |
| residue="T" | sub="S" | probability="0.004"  |
| residue="S" | sub="W" | probability="0.0008" |
| residue="W" | sub="S" | probability="0.0008" |
| residue="S" | sub="Y" | probability="0.001"  |
| residue="Y" | sub="S" | probability="0.001"  |
| residue="S" | sub="V" | probability="0.001"  |
| residue="V" | sub="S" | probability="0.001"  |
| residue="T" | sub="W" | probability="0.001"  |
| residue="W" | sub="T" | probability="0.001"  |
| residue="T" | sub="Y" | probability="0.001"  |



|             |         |                      |
|-------------|---------|----------------------|
| residue="Y" | sub="T" | probability="0.001"  |
| residue="T" | sub="V" | probability="0.003"  |
| residue="V" | sub="T" | probability="0.003"  |
| residue="W" | sub="Y" | probability="0.005"  |
| residue="Y" | sub="W" | probability="0.005"  |
| residue="W" | sub="V" | probability="0.0008" |
| residue="V" | sub="W" | probability="0.0008" |
| residue="Y" | sub="V" | probability="0.0015" |
| residue="V" | sub="Y" | probability="0.0015" |

Cleavage probabilities for Trypsin (miscleavage factor 0.75)

- CLEAVAGE\_RULE after="Arginine" prob="0.90">
  - exception before="Proline" prob="0.15"
  - exception before="Aspartic Acid" prob="0.70"
  - exception before="Glutamic Acid" prob="0.85"
  
- CLEAVAGE\_RULE after="Lysine" prob="0.80">
  - exception before="Proline" prob="0.034"
  - exception before="Lysine" prob="0.70"
  - exception before="Aspartic Acid" prob="0.50"
  - exception before="Glutamic Acid" prob="0.60"
  
- CLEAVAGE\_RULE after="Tyrosine" prob="0.00001">
  - exception before="Alanine" prob="0.033"
  - exception before="Cysteine" prob="0.00003"
  - exception before="Aspartic Acid" prob="0.001"
  - exception before="Glutamic Acid" prob="0.001"
  - exception before="Phenylalanine" prob="0.018"
  - exception before="Glycine" prob="0.008"
  - exception before="Histidine" prob="0.018"
  - exception before="Isoleucine" prob="0.018"
  - exception before="Lysine" prob="0.0008"
  - exception before="Leucine" prob="0.008"
  - exception before="Methionine" prob="0.019"
  - exception before="Asparagine" prob="0.0004"
  - exception before="Proline" prob="0.005"
  - exception before="Glutamine" prob="0.0004"
  - exception before="Arginine" prob="0.0006"
  - exception before="Serine" prob="0.002"
  - exception before="Threonine" prob="0.002"
  - exception before="Valine" prob="0.001"
  - exception before="Tryptophan" prob="0.00008"
  - exception before="Tyrosine" prob="0.0003"
  
- CLEAVAGE\_RULE after="Phenylalanine" prob="0.00001">
  - exception before="Alanine" prob="0.014"
  - exception before="Cysteine" prob="0.025"
  - exception before="Aspartic Acid" prob="0.002"
  - exception before="Glutamic Acid" prob="0.002"
  - exception before="Phenylalanine" prob="0.004"
  - exception before="Glycine" prob="0.004"
  - exception before="Histidine" prob="0.003"
  - exception before="Isoleucine" prob="0.006"
  - exception before="Lysine" prob="0.002"
  - exception before="Leucine" prob="0.01"
  - exception before="Methionine" prob="0.02"
  - exception before="Asparagine" prob="0.002"
  - exception before="Proline" prob="0.003"
  - exception before="Glutamine" prob="0.006"
  - exception before="Arginine" prob="0.001"

```

exception before="Serine" prob="0.028"
exception before="Threonine" prob="0.012"
exception before="Valine" prob="0.012"
exception before="Tryptophan" prob="0.00002"
exception before="Tyrosine" prob="0.003"

- CLEAVAGE_RULE after="Leucine" prob="0.00001">
exception before="Alanine" prob="0.006"
exception before="Cysteine" prob="0.002"
exception before="Aspartic Acid" prob="0.002"
exception before="Glutamic Acid" prob="0.0004"
exception before="Phenylalanine" prob="0.008"
exception before="Glycine" prob="0.004"
exception before="Histidine" prob="0.007"
exception before="Isoleucine" prob="0.004"
exception before="Lysine" prob="0.0008"
exception before="Leucine" prob="0.002"
exception before="Methionine" prob="0.007"
exception before="Asparagine" prob="0.004"
exception before="Proline" prob="0.011"
exception before="Glutamine" prob="0.002"
exception before="Arginine" prob="0.003"
exception before="Serine" prob="0.01"
exception before="Threonine" prob="0.006"
exception before="Valine" prob="0.004"
exception before="Tryptophan" prob="0.0009"
exception before="Tyrosine" prob="0.002"

- CLEAVAGE_RULE after="Methionine" prob="0.00001">
exception before="Alanine" prob="0.041"
exception before="Cysteine" prob="0.018"
exception before="Aspartic Acid" prob="0.001"
exception before="Glutamic Acid" prob="0.002"
exception before="Phenylalanine" prob="0.007"
exception before="Glycine" prob="0.004"
exception before="Histidine" prob="0.002"
exception before="Isoleucine" prob="0.012"
exception before="Lysine" prob="0.001"
exception before="Leucine" prob="0.0006"
exception before="Methionine" prob="0.015"
exception before="Asparagine" prob="0.003"
exception before="Proline" prob="0.03"
exception before="Glutamine" prob="0.0009"
exception before="Arginine" prob="0.001"
exception before="Serine" prob="0.122"
exception before="Threonine" prob="0.034"
exception before="Valine" prob="0.01"
exception before="Tryptophan" prob="0.00002"
exception before="Tyrosine" prob="0.00002"

- CLEAVAGE_RULE after="Histidine" prob="0.00001">
exception before="Alanine" prob="0.034"
exception before="Cysteine" prob="0.028"
exception before="Aspartic Acid" prob="0.00002"
exception before="Glutamic Acid" prob="0.0004"
exception before="Phenylalanine" prob="0.001"
exception before="Glycine" prob="0.002"
exception before="Histidine" prob="0.004"
exception before="Isoleucine" prob="0.013"
exception before="Lysine" prob="0.005"
exception before="Leucine" prob="0.009"
exception before="Methionine" prob="0.006"

```

exception before="Asparagine" prob="0.00005"  
exception before="Proline" prob="0.002"  
exception before="Glutamine" prob="0.001"  
exception before="Arginine" prob="0.0007"  
exception before="Serine" prob="0.011"  
exception before="Threonine" prob="0.011"  
exception before="Valine" prob="0.003"  
exception before="Tryptophan" prob="0.004"  
exception before="Tyrosine" prob="0.021"

- CLEAVAGE\_RULE after="Asparagine" prob="0.00001">  
exception before="Alanine" prob="0.004"  
exception before="Cysteine" prob="0.02"  
exception before="Aspartic Acid" prob="0.00007"  
exception before="Glutamic Acid" prob="0.0003"  
exception before="Phenylalanine" prob="0.002"  
exception before="Glycine" prob="0.004"  
exception before="Histidine" prob="0.002"  
exception before="Isoleucine" prob="0.003"  
exception before="Lysine" prob="0.00003"  
exception before="Leucine" prob="0.002"  
exception before="Methionine" prob="0.014"  
exception before="Asparagine" prob="0.002"  
exception before="Proline" prob="0.002"  
exception before="Glutamine" prob="0.0004"  
exception before="Arginine" prob="0.00002"  
exception before="Serine" prob="0.016"  
exception before="Threonine" prob="0.011"  
exception before="Valine" prob="0.003"  
exception before="Tryptophan" prob="0.001"  
exception before="Tyrosine" prob="0.002"

- CLEAVAGE\_RULE after="Proline" prob="0.00001">  
exception before="Alanine" prob="0.002"  
exception before="Cysteine" prob="0.003"  
exception before="Aspartic Acid" prob="0.004"  
exception before="Glutamic Acid" prob="0.001"  
exception before="Phenylalanine" prob="0.004"  
exception before="Glycine" prob="0.002"  
exception before="Histidine" prob="0.0004"  
exception before="Isoleucine" prob="0.00009"  
exception before="Lysine" prob="0.0008"  
exception before="Leucine" prob="0.0009"  
exception before="Methionine" prob="0.002"  
exception before="Asparagine" prob="0.0009"  
exception before="Proline" prob="0.001"  
exception before="Glutamine" prob="0.002"  
exception before="Arginine" prob="0.001"  
exception before="Serine" prob="0.002"  
exception before="Threonine" prob="0.002"  
exception before="Valine" prob="0.0007"  
exception before="Tryptophan" prob="0.0004"  
exception before="Tyrosine" prob="0.0003"

- CLEAVAGE\_RULE after="Isoleucine" prob="0.00001">  
exception before="Alanine" prob="0.0007"  
exception before="Cysteine" prob="0.00002"  
exception before="Aspartic Acid" prob="0.0002"  
exception before="Glutamic Acid" prob="0.0009"  
exception before="Phenylalanine" prob="0.001"  
exception before="Glycine" prob="0.002"  
exception before="Histidine" prob="0.00009"

exception before="Isoleucine" prob="0.003"  
exception before="Lysine" prob="0.001"  
exception before="Leucine" prob="0.001"  
exception before="Methionine" prob="0.0005"  
exception before="Asparagine" prob="0.0009"  
exception before="Proline" prob="0.009"  
exception before="Glutamine" prob="0.002"  
exception before="Arginine" prob="0.004"  
exception before="Serine" prob="0.0009"  
exception before="Threonine" prob="0.003"  
exception before="Valine" prob="0.002"  
exception before="Tryptophan" prob="0.013"  
exception before="Tyrosine" prob="0.0002"

- CLEAVAGE\_RULE after="Alanine" prob="0.00001">  
exception before="Alanine" prob="0.004"  
exception before="Cysteine" prob="0.003"  
exception before="Aspartic Acid" prob="0.005"  
exception before="Glutamic Acid" prob="0.003"  
exception before="Phenylalanine" prob="0.001"  
exception before="Glycine" prob="0.002"  
exception before="Histidine" prob="0.0005"  
exception before="Isoleucine" prob="0.0008"  
exception before="Lysine" prob="0.001"  
exception before="Leucine" prob="0.001"  
exception before="Methionine" prob="0.002"  
exception before="Asparagine" prob="0.0003"  
exception before="Proline" prob="0.002"  
exception before="Glutamine" prob="0.0007"  
exception before="Arginine" prob="0.00006"  
exception before="Serine" prob="0.003"  
exception before="Threonine" prob="0.0007"  
exception before="Valine" prob="0.002"  
exception before="Tryptophan" prob="0.00002"  
exception before="Tyrosine" prob="0.00002"

- CLEAVAGE\_RULE after="Valine" prob="0.00001">  
exception before="Alanine" prob="0.0004"  
exception before="Cysteine" prob="0.00002"  
exception before="Aspartic Acid" prob="0.0004"  
exception before="Glutamic Acid" prob="0.0001"  
exception before="Phenylalanine" prob="0.002"  
exception before="Glycine" prob="0.001"  
exception before="Histidine" prob="0.0001"  
exception before="Isoleucine" prob="0.0009"  
exception before="Lysine" prob="0.0002"  
exception before="Leucine" prob="0.0003"  
exception before="Methionine" prob="0.0005"  
exception before="Asparagine" prob="0.0004"  
exception before="Proline" prob="0.01"  
exception before="Glutamine" prob="0.00002"  
exception before="Arginine" prob="0.002"  
exception before="Serine" prob="0.0009"  
exception before="Threonine" prob="0.0003"  
exception before="Valine" prob="0.0004"  
exception before="Tryptophan" prob="0.00002"  
exception before="Tyrosine" prob="0.0002"

- CLEAVAGE\_RULE after="Glutamine" prob="0.00001">  
exception before="Alanine" prob="0.003"  
exception before="Cysteine" prob="0.00003"  
exception before="Aspartic Acid" prob="0.002"

exception before="Glutamic Acid" prob="0.0002"  
exception before="Phenylalanine" prob="0.0006"  
exception before="Glycine" prob="0.002"  
exception before="Histidine" prob="0.001"  
exception before="Isoleucine" prob="0.00002"  
exception before="Lysine" prob="0.0007"  
exception before="Leucine" prob="0.0009"  
exception before="Methionine" prob="0.00002"  
exception before="Asparagine" prob="0.0004"  
exception before="Proline" prob="0.0003"  
exception before="Glutamine" prob="0.0004"  
exception before="Arginine" prob="0.0002"  
exception before="Serine" prob="0.001"  
exception before="Threonine" prob="0.0003"  
exception before="Valine" prob="0.0003"  
exception before="Tryptophan" prob="0.00002"  
exception before="Tyrosine" prob="0.0007"

- CLEAVAGE\_RULE after="Glycine" prob="0.00001">  
exception before="Alanine" prob="0.0005"  
exception before="Cysteine" prob="0.0006"  
exception before="Aspartic Acid" prob="0.0002"  
exception before="Glutamic Acid" prob="0.0006"  
exception before="Phenylalanine" prob="0.00006"  
exception before="Glycine" prob="0.0007"  
exception before="Histidine" prob="0.0002"  
exception before="Isoleucine" prob="0.0007"  
exception before="Lysine" prob="0.0002"  
exception before="Leucine" prob="0.0007"  
exception before="Methionine" prob="0.0006"  
exception before="Asparagine" prob="0.0005"  
exception before="Proline" prob="0.0001"  
exception before="Glutamine" prob="0.00002"  
exception before="Arginine" prob="0.0004"  
exception before="Serine" prob="0.0007"  
exception before="Threonine" prob="0.003"  
exception before="Valine" prob="0.0007"  
exception before="Tryptophan" prob="0.00002"  
exception before="Tyrosine" prob="0.0005"

- CLEAVAGE\_RULE after="Threonine" prob="0.00001">  
exception before="Alanine" prob="0.0003"  
exception before="Cysteine" prob="0.00002"  
exception before="Aspartic Acid" prob="0.0002"  
exception before="Glutamic Acid" prob="0.002"  
exception before="Phenylalanine" prob="0.0002"  
exception before="Glycine" prob="0.001"  
exception before="Histidine" prob="0.00005"  
exception before="Isoleucine" prob="0.0004"  
exception before="Lysine" prob="0.0002"  
exception before="Leucine" prob="0.0007"  
exception before="Methionine" prob="0.0004"  
exception before="Asparagine" prob="0.00004"  
exception before="Proline" prob="0.001"  
exception before="Glutamine" prob="0.001"  
exception before="Arginine" prob="0.0007"  
exception before="Serine" prob="0.001"  
exception before="Threonine" prob="0.0007"  
exception before="Valine" prob="0.0006"  
exception before="Tryptophan" prob="0.00002"  
exception before="Tyrosine" prob="0.0004"

```

- CLEAVAGE_RULE after="Cysteine" prob="0.00001">
  exception before="Alanine" prob="0.0003"
  exception before="Cysteine" prob="0.00002"
  exception before="Aspartic Acid" prob="0.0008"
  exception before="Glutamic Acid" prob="0.00002"
  exception before="Phenylalanine" prob="0.002"
  exception before="Glycine" prob="0.00002"
  exception before="Histidine" prob="0.008"
  exception before="Isoleucine" prob="0.005"
  exception before="Lysine" prob="0.001"
  exception before="Leucine" prob="0.00002"
  exception before="Methionine" prob="0.00002"
  exception before="Asparagine" prob="0.002"
  exception before="Proline" prob="0.005"
  exception before="Glutamine" prob="0.00002"
  exception before="Arginine" prob="0.002"
  exception before="Serine" prob="0.0007"
  exception before="Threonine" prob="0.006"
  exception before="Valine" prob="0.0003"
  exception before="Tryptophan" prob="0.00005"
  exception before="Tyrosine" prob="0.00002"

- CLEAVAGE_RULE after="Glutamic Acid" prob="0.00001">
  exception before="Alanine" prob="0.0001"
  exception before="Cysteine" prob="0.00002"
  exception before="Aspartic Acid" prob="0.0004"
  exception before="Glutamic Acid" prob="0.0009"
  exception before="Phenylalanine" prob="0.0005"
  exception before="Glycine" prob="0.0003"
  exception before="Histidine" prob="0.00002"
  exception before="Isoleucine" prob="0.0002"
  exception before="Lysine" prob="0.0001"
  exception before="Leucine" prob="0.0005"
  exception before="Methionine" prob="0.00009"
  exception before="Asparagine" prob="0.00002"
  exception before="Proline" prob="0.002"
  exception before="Glutamine" prob="0.00002"
  exception before="Arginine" prob="0.0005"
  exception before="Serine" prob="0.001"
  exception before="Threonine" prob="0.0008"
  exception before="Valine" prob="0.0008"
  exception before="Tryptophan" prob="0.00002"
  exception before="Tyrosine" prob="0.0004"

- CLEAVAGE_RULE after="Tryptophan" prob="0.00001">
  exception before="Alanine" prob="0.015"
  exception before="Cysteine" prob="0.001"
  exception before="Aspartic Acid" prob="0.003"
  exception before="Glutamic Acid" prob="0.0009"
  exception before="Phenylalanine" prob="0.00002"
  exception before="Glycine" prob="0.004"
  exception before="Histidine" prob="0.00002"
  exception before="Isoleucine" prob="0.00002"
  exception before="Lysine" prob="0.00002"
  exception before="Leucine" prob="0.004"
  exception before="Methionine" prob="0.00003"
  exception before="Asparagine" prob="0.00002"
  exception before="Proline" prob="0.00002"
  exception before="Glutamine" prob="0.001"
  exception before="Arginine" prob="0.002"
  exception before="Serine" prob="0.003"
  exception before="Threonine" prob="0.00002"

```

exception before="Valine" prob="0.00002"  
exception before="Tryptophan" prob="0.00002"  
exception before="Tyrosine" prob="0.00002"

- CLEAVAGE\_RULE after="Serine" prob="0.00001">  
exception before="Alanine" prob="0.001"  
exception before="Cysteine" prob="0.0003"  
exception before="Aspartic Acid" prob="0.00002"  
exception before="Glutamic Acid" prob="0.0001"  
exception before="Phenylalanine" prob="0.0006"  
exception before="Glycine" prob="0.0004"  
exception before="Histidine" prob="0.00002"  
exception before="Isoleucine" prob="0.001"  
exception before="Lysine" prob="0.0001"  
exception before="Leucine" prob="0.0001"  
exception before="Methionine" prob="0.0003"  
exception before="Asparagine" prob="0.00002"  
exception before="Proline" prob="0.001"  
exception before="Glutamine" prob="0.0001"  
exception before="Arginine" prob="0.00002"  
exception before="Serine" prob="0.0003"  
exception before="Threonine" prob="0.00002"  
exception before="Valine" prob="0.0003"  
exception before="Tryptophan" prob="0.00002"  
exception before="Tyrosine" prob="0.0008"

- CLEAVAGE\_RULE after="Aspartic Acid" prob="0.00001">  
exception before="Alanine" prob="0.0006"  
exception before="Cysteine" prob="0.00002"  
exception before="Aspartic Acid" prob="0.0003"  
exception before="Glutamic Acid" prob="0.0001"  
exception before="Phenylalanine" prob="0.0003"  
exception before="Glycine" prob="0.00006"  
exception before="Histidine" prob="0.00002"  
exception before="Isoleucine" prob="0.0008"  
exception before="Lysine" prob="0.00002"  
exception before="Leucine" prob="0.0002"  
exception before="Methionine" prob="0.00002"  
exception before="Asparagine" prob="0.00002"  
exception before="Proline" prob="0.008"  
exception before="Glutamine" prob="0.00002"  
exception before="Arginine" prob="0.001"  
exception before="Serine" prob="0.00002"  
exception before="Threonine" prob="0.0003"  
exception before="Valine" prob="0.0004"  
exception before="Tryptophan" prob="0.00002"  
exception before="Tyrosine" prob="0.0001"
