# Supplementary material
Source: PubMed Central journal article supplement (PMC3708173)
Supplement: supp_M112.023143_mcp.M112.023143-4.pdf [file supp_M112.023143_mcp.M112.023143-4.pdf]

| <b>Name</b>    | <b>%Cov(90)</b> | <b>Accessions</b>                         |
|----------------|-----------------|-------------------------------------------|
| 3FTx 1         | 71.666667       | Translation_Of_Ame_RL7_rep_c283_Reverse-1 |
| 3FTx 2         | 50.819762       | Translation_Of_Ame_RL7_rep_c165_Forward-3 |
| 3FTx 2         | 50.819762       | Translation_Of_Ame_RL7_rep_c165_Forward-3 |
| Alpha-tectorin | 6.87000006      | Translation_Of_Ame_RL7_c800_Forward-1     |
| C-type lectin  | 2.905           | Translation_Of_Ame_RL7_c8-1_Forward-1     |

**Conf**      **Sequence**  
99 ECAEGQDSCITVHTMGLK

99 ICCCTDNNCNTLV  
99 LTCCTSVFCNPK

99 ICCCTDNNCNTLV  
99 LTCCTSVFCNPK  
99 LTCCTSVFCNPK

90.66 LTCCTSVFCIR

99 ECAEGQDSCITVHTMGLK  
99 NYYNIPGSR  
95.71 TNYTPWK

| <b>Modifications</b>                                           | <b>Cleavages</b> | <b>dMass</b> |
|----------------------------------------------------------------|------------------|--------------|
| Ethanolyl(C)@2; Ethanolyl(C)@9; Oxidation(M)@15                |                  | 0.0994498    |
| Ethanolyl(C)@2; Ethanolyl(C)@3; Ethanolyl(C)@4; Ethanolyl(C)@9 |                  | 0.097004     |
| Ethanolyl(C)@3; Ethanolyl(C)@4; Ethanolyl(C)@9                 |                  | 0.0328343    |
| Ethanolyl(C)@2; Ethanolyl(C)@3; Ethanolyl(C)@4; Ethanolyl(C)@9 |                  | 0.097004     |
| Ethanolyl(C)@3; Ethanolyl(C)@4; Ethanolyl(C)@9                 |                  | 0.0799973    |
| Ethanolyl(C)@3; Ethanolyl(C)@4; Ethanolyl(C)@9                 |                  | 0.0775559    |
| Ethanolyl(C)@3; Ethanolyl(C)@4; Ethanolyl(C)@9                 |                  | 0.0702178    |
| Ethanolyl(C)@2; Ethanolyl(C)@9; Oxidation(M)@15                |                  | 0.0994498    |
|                                                                |                  | 0.0333173    |
|                                                                |                  | 0.0196182    |

| Prec MW    | Prec m/z | Theor MW   | Theor m/z  | Theor z | Score | PrecursorSignal |
|------------|----------|------------|------------|---------|-------|-----------------|
| 2024.98474 | 676.0022 | 2024.88525 | 675.969055 | 3       |       | 11 327.9738     |
| 1590.73682 | 796.3757 | 1590.63977 | 796.327148 | 2       |       | 11 4371.185     |
| 1446.68848 | 483.2368 | 1446.65564 | 483.22583  | 3       |       | 10 691.2709     |
| 1590.73682 | 796.3757 | 1590.63977 | 796.327148 | 2       |       | 14 4371.185     |
| 1446.73572 | 724.3751 | 1446.65564 | 724.335144 | 2       |       | 15 7299.476     |
| 1446.73572 | 724.3751 | 1446.65564 | 724.335144 | 2       |       | 15 7299.476     |
| 1446.73572 | 724.3751 | 1446.65564 | 724.335144 | 2       |       | 16 7299.476     |
| 1446.73572 | 724.3751 | 1446.65564 | 724.335144 | 2       |       | 12 7299.476     |
| 1446.73572 | 724.3751 | 1446.65564 | 724.335144 | 2       |       | 11 7299.476     |
| 1446.73572 | 724.3751 | 1446.65564 | 724.335144 | 2       |       | 11 7299.476     |
| 1446.73572 | 724.3751 | 1446.65564 | 724.335144 | 2       |       | 10 7299.476     |
| 1446.73572 | 724.3751 | 1446.65564 | 724.335144 | 2       |       | 9 7299.476      |
| 1446.73328 | 724.3739 | 1446.65564 | 724.335144 | 2       |       | 10 1912.791     |
| 1376.72046 | 689.3675 | 1376.65027 | 689.332398 | 2       |       | 11 1338.846     |
| 2024.98474 | 676.0022 | 2024.88525 | 675.969055 | 3       |       | 11 327.9738     |
| 1082.54785 | 542.2812 | 1082.51453 | 542.264526 | 2       |       | 10 116.5502     |
| 908.458862 | 455.2367 | 908.439209 | 455.226898 | 2       |       | 6 97.0272       |
